# Supplementary material for: University Students’ Attitudes Toward Artificial Intelligence: An Exploratory Study of the Cognitive, Emotional, And Behavioural Dimensions of AI Attitudes
Source: Preprints.org preprint supplement (doi:10.20944/preprints202408.1360.v1), 2024-08-20

**Supplemental Materials for Article “University Students’ Attitudes Toward Artificial Intelligence: Exploring the Cognitive, Emotional, And Behavioural Dimensions of AI Attitudes”**

*Item wordings in English (Adapted Scale for the Greek University Context)*

1. I think that it is important to learn about AI in my university studies
2. AI classes are important
3. I think that lessons about AI should be taught in university
4. I think every university student should learn about AI in university.
5. AI is very important for developing society
6. I think AI makes people’s lives more convenient
7. AI is related to my daily life
8. I will use AI to solve problems in daily life
9. AI helps me solve problems in real life
10. I will need AI in my life in the future
11. AI is necessary for everyone
12. AI produces more good than bad
13. It is worth to know AI very well
14. I think that most jobs in the future will require knowledge related to AI
15. I like using apps related to AI
16. It is fun to learn about AI.
17. I want to continue learning about AI
18. I’m interested in AI-related TV programs or online videos
19. I want to make something that makes human life more convenient through AI.
20. I am interested in the development of AI
21. It is interesting to use AI.
22. I think that there should be more class time devoted to AI in university
23. I can use well the apps based on AI
24. I will use AI in the future in my professional life
25. It would be very helpful for me to have available AI apps in my professional life
26. ~~I am afraid of AI in education~~ (this item did not load on any principal component)

*Item wordings in Greek* *(Adapted Scale for the Greek University Context)*

**Πόσο συμφωνείτε ή διαφωνείτε με τις παρακάτω δηλώσεις:**

|  | Διαφωνώ απόλυτα | Διαφωνώ | Ούτε διαφωνώ, ούτε συμφωνώ | Συμφωνώ | Συμφωνώ απόλυτα |
| --- | --- | --- | --- | --- | --- |
| 1. είναι σημαντικό να ενταχθούν οι εφαρμογές της Τεχνητής Νοημοσύνης στις πανεπιστημιακές μας σπουδές. |  |  |  |  |  |
| 1. μαθήματα που αφορούν την τεχνητή νοημοσύνη είναι σημαντικά |  |  |  |  |  |
| 1. μαθήματα σχετικά με την Τεχνητή Νοημοσύνη πρέπει να διδάσκονται στο πανεπιστήμιο. |  |  |  |  |  |
| 1. κάθε φοιτητής πρέπει να μάθει για την Τεχνητή Νοημοσύνη στο πανεπιστήμιο. |  |  |  |  |  |
| 1. η τεχνητή νοημοσύνη είναι πολύ σημαντική για την ανάπτυξη της κοινωνίας μας. |  |  |  |  |  |
| 1. η Τεχνητή Νοημοσύνη καθιστά τη ζωή των ανθρώπων πιο βολική. |  |  |  |  |  |
| 1. η τεχνητή νοημοσύνη σχετίζεται με την καθημερινότητα μου. |  |  |  |  |  |
| 1. θα χρησιμοποιήσω την Τεχνητή Νοημοσύνη για να λύσω προβλήματα στην καθημερινή μου ζωή. |  |  |  |  |  |
| 1. η Τεχνητή Νοημοσύνη με βοηθά να λύσω προβλήματα στην πραγματική ζωή. |  |  |  |  |  |
| 1. θα χρειαστώ την τεχνητή νοημοσύνη στο μέλλον. |  |  |  |  |  |
| 1. η Τεχνητή Νοημοσύνη είναι απαραίτητη για όλους. |  |  |  |  |  |
| 1. η Τεχνητή Νοημοσύνη προσφέρει περισσότερα καλά από κακά. |  |  |  |  |  |
| 1. αξίζει να γνωρίζω καλά τη χρήση της τεχνητής νοημοσύνης. |  |  |  |  |  |
| 1. η πλειονότητα των επαγγελμάτων στο μέλλον θα απαιτεί γνώσεις σχετικά με την Τεχνητή Νοημοσύνη. |  |  |  |  |  |
| 1. μου αρέσει να χρησιμοποιώ εφαρμογές που σχετίζονται με την Τεχνητή Νοημοσύνη. ( τροποποίηση ) |  |  |  |  |  |
| 1. είναι διασκεδαστικό να μαθαίνεις για την Τεχνητή Νοημοσύνη. (19) |  |  |  |  |  |
| 1. θέλω να συνεχίσω να μαθαίνω για την Τεχνητή Νοημοσύνη. (20 ) |  |  |  |  |  |
| 1. ενδιαφέρομαι για τηλεοπτικές εκπομπές ή διαδικτυακά βίντεο που σχετίζονται με την Τεχνητή Νοημοσύνη. (21) |  |  |  |  |  |
| 1. θα ήθελα να συμμετέχω σε κάτι που θα καθιστά την ανθρώπινη ζωή πιο βολική μέσω της Τεχνητής Νοημοσύνης. (22) |  |  |  |  |  |
| 1. ενδιαφέρομαι για την ανάπτυξη της Τεχνητής Νοημοσύνης. (23) |  |  |  |  |  |
| 1. είναι ενδιαφέρον να χρησιμοποιείς την Τεχνητή Νοημοσύνη. (24) |  |  |  |  |  |
| 1. θα έπρεπε να υπάρχει περισσότερος χρόνος διδασκαλίας για την Τεχνητή Νοημοσύνη στο πανεπιστήμιο. (25) |  |  |  |  |  |
| 1. μπορώ να χειριστώ καλά τις εφαρμογές που είναι βασισμένες στην Τεχνητή Νοημοσύνη. (26) |  |  |  |  |  |
| 1. Θα χρειαστώ την τεχνητή νοημοσύνη στο μέλλον ως επαγγελματίας ( στην επαγγελματική μου ζωή) ( δικες μας ) |  |  |  |  |  |
| 1. θα είναι πολύ βοηθητικό για εμένα να έχω στην μελλοντική επαγγελματική μου ζωή τις εφαρμογές της τεχνητής νοημοσύνης. ( δικές μας) |  |  |  |  |  |
| 1. ~~Με φοβίζει η τεχνητή νοημοσύνη στην εκπαίδευση~~ |  |  |  |  |  |

Original Scale as Presented in Suh, W., & Ahn, S. (2022). Development and validation of a scale measuring student attitudes toward artificial intelligence. *SAGE Open*, *12*(2), Article 2. <https://doi.org/10.1177/21582440221100463>


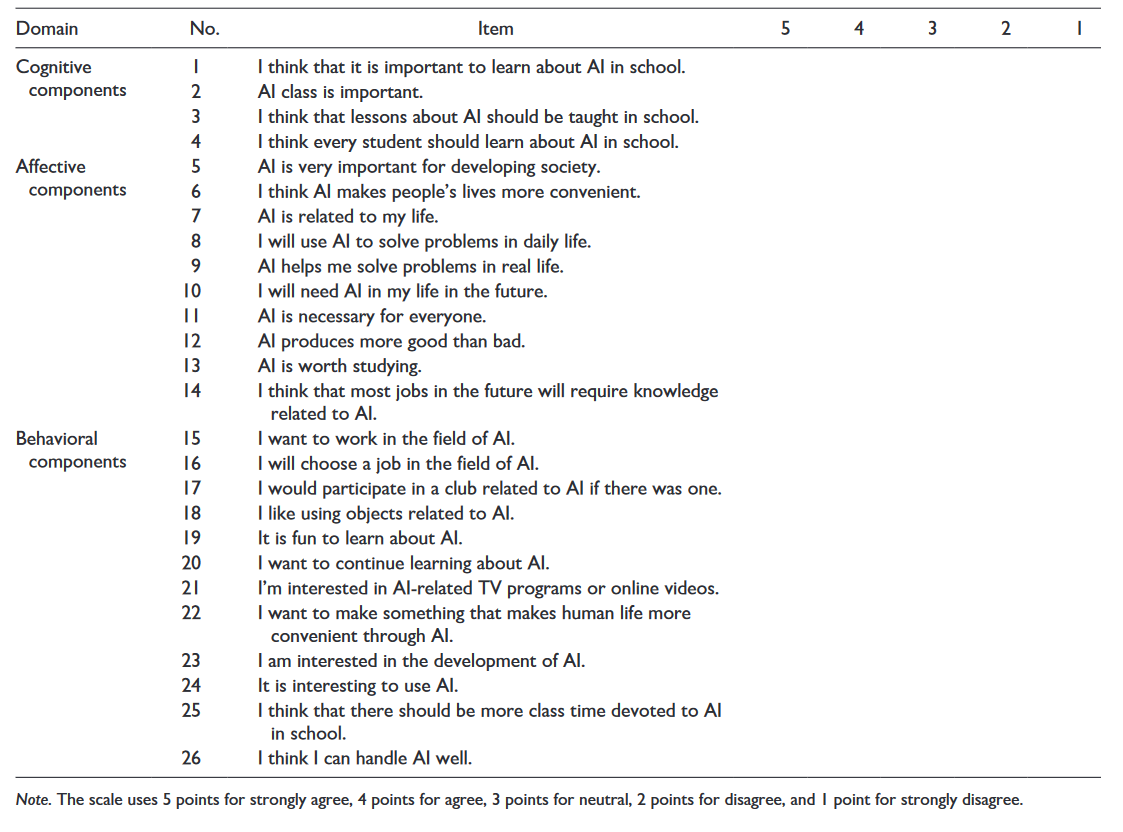

Supplement: Supplementary file 1 [file supplementary]
